# Supplementary material for: Prevalence and Factors Associated with Non-adherence to Antituberculosis Medications in Dar es salaam, Tanzania
Source: Research Square preprint supplement (doi:10.21203/rs.3.rs-6857120/v1), 2025-08-11
Supplement: Supplementary file 1 [file 8d8e0e6d302139d239c3877b.pdf]

## QUESTIONNAIRE:

### Part I: Socio-Demographic Characteristics

|                                                                  |                                              |                          |
|------------------------------------------------------------------|----------------------------------------------|--------------------------|
| Participant ID:                                                  |                                              |                          |
| Please give correct answer to the following questions            |                                              |                          |
| 1. Age:                                                          | -----Years                                   |                          |
| 2. Sex:                                                          | 1= Male                                      | <input type="checkbox"/> |
|                                                                  | 2= Female                                    | <input type="checkbox"/> |
| 3. Time in average from home of participant to treatment center. | 1=<30 minutes                                | <input type="checkbox"/> |
|                                                                  | 2=>30 minutes                                | <input type="checkbox"/> |
| 4. Education level:                                              | 1 = Did not go to school                     | <input type="checkbox"/> |
|                                                                  | 2 = Primary education                        | <input type="checkbox"/> |
|                                                                  | 3=Some primary                               |                          |
|                                                                  | 4 =Secondary education                       | <input type="checkbox"/> |
|                                                                  | 5=Some secondary                             |                          |
| 5. Marital status                                                | 6 = University education                     | <input type="checkbox"/> |
|                                                                  | 1 = Single                                   | <input type="checkbox"/> |
|                                                                  | 2 = Married                                  | <input type="checkbox"/> |
|                                                                  | 3 = Divorced                                 | <input type="checkbox"/> |
| 6. Participant employment status                                 | 4 = Widowed                                  | <input type="checkbox"/> |
|                                                                  | 1=Unemployed                                 | <input type="checkbox"/> |
|                                                                  | 2=Government employment                      | <input type="checkbox"/> |
|                                                                  | 3=Private employment                         | <input type="checkbox"/> |
|                                                                  | 4=Self-employed.                             | <input type="checkbox"/> |
|                                                                  | 5=Employed but stopped because of TB disease | <input type="checkbox"/> |

## Part II: Health care provider -related factors

|                                                                                                                |                  |                          |
|----------------------------------------------------------------------------------------------------------------|------------------|--------------------------|
| 1. How long do you spend at the hospital during your visit?                                                    | 1 = < 1 hour     | <input type="checkbox"/> |
|                                                                                                                | 2 = 1-2 hours    | <input type="checkbox"/> |
|                                                                                                                | 3= 3 hours       | <input type="checkbox"/> |
|                                                                                                                | 4 = > 3 hours    | <input type="checkbox"/> |
| 3. Are the health care workers usually tell you the importance of taking drugs regularly and adhering to them? | 1 = Yes          | <input type="checkbox"/> |
|                                                                                                                | 2 = No           | <input type="checkbox"/> |
| 5. How can you rate the staffing relationship at the health facility?                                          | 1 = Very bad     | <input type="checkbox"/> |
|                                                                                                                | 2 = Bad          | <input type="checkbox"/> |
|                                                                                                                | 3= Indifferently | <input type="checkbox"/> |
|                                                                                                                | 4 = Good         | <input type="checkbox"/> |
|                                                                                                                | 5=Very good      | <input type="checkbox"/> |

### Part III Patient-Related Factor

#### (A). WHO Alcohol Use Disorder Identification Test (AUDIT))

|                                                                                                                                                                                                                                                                                                                                                                                                                                                                                |                      |                                                                                                                                                                                                                                      |
|--------------------------------------------------------------------------------------------------------------------------------------------------------------------------------------------------------------------------------------------------------------------------------------------------------------------------------------------------------------------------------------------------------------------------------------------------------------------------------|----------------------|--------------------------------------------------------------------------------------------------------------------------------------------------------------------------------------------------------------------------------------|
| Participant ID                                                                                                                                                                                                                                                                                                                                                                                                                                                                 |                      |                                                                                                                                                                                                                                      |
| <b>The Alcohol Use Disorders Identification Test: Interview Version</b><br>Read questions as written. Record answers carefully. Begin the AUDIT by saying “Now I am going to ask you some questions about your use of alcoholic beverages during this past year.” Explain what is meant by “alcoholic beverages” by using local examples of local beer, wine, vodka, etc. Code answers in terms of “standard drinks”. Place the correct answer number in the box at the right. |                      |                                                                                                                                                                                                                                      |
| 1. How often do you have a drink containing alcohol?<br>(0) Never [Skip to Qs 9-10]<br>(1) Monthly or less<br>(2) 2 to 4 times a month<br>(3) 2 to 3 times a week<br>(4) 4 or more times a week                                                                                                                                                                                                                                                                                | <input type="text"/> | 6. How often during the last year have you needed a first drink in the morning to get yourself going after a heavy drinking session?<br>(0) Never<br>(1) Less than monthly<br>(2) Monthly<br>(3) Weekly<br>(4) Daily or almost daily |
| 2. How many drinks containing alcohol do you have on a typical day when you are drinking?<br>(0) 1 or 2<br>(1) 3 or 4<br>(2) 5 or 6<br>(3) 7, 8, or 9<br>(4) 10 or more                                                                                                                                                                                                                                                                                                        | <input type="text"/> | 7. How often during the last year have you had a feeling of guilt or remorse after drinking?<br>(0) Never<br>(1) Less than monthly<br>(2) Monthly<br>(3) Weekly<br>(4) Daily or almost daily                                         |

|                                                                                                                                                                                                                                                                                         |                                                                                                                                                                                                                                                                                  |
|-----------------------------------------------------------------------------------------------------------------------------------------------------------------------------------------------------------------------------------------------------------------------------------------|----------------------------------------------------------------------------------------------------------------------------------------------------------------------------------------------------------------------------------------------------------------------------------|
| <p>3. How often do you have six or more drinks on one occasion?</p> <p>(0) Never</p> <p>(1) Less than monthly</p> <p>(2) Monthly <input type="text"/></p> <p>(3) Weekly</p> <p>(4) Daily or almost daily</p> <p>Skip to Questions 9 and 10 if Total Score for Questions 2 and 3 = 0</p> | <p>8. How often during the last year have you been unable to remember what happened the night before because you had been drinking?</p> <p>(0) Never</p> <p>(1) Less than monthly <input type="text"/></p> <p>(2) Monthly</p> <p>(3) Weekly</p> <p>(4) Daily or almost daily</p> |
| <p>4. How often during the last year have you found that you were not able to stop drinking once you had started?</p> <p>(0) Never</p> <p>(1) Less than monthly <input type="text"/></p> <p>(2) Monthly</p> <p>(3) Weekly</p> <p>(4) Daily or almost daily</p>                          | <p>9. Have you or someone else been injured as a result of your drinking?</p> <p>(0) No</p> <p>(2) Yes, but not in the last year</p> <p>(4) Yes, during the last year <input type="text"/></p>                                                                                   |
| <p>5. How often during the last year have you failed to do what was normally expected from you because of drinking?</p> <p>(0) Never</p> <p>(1) Less than monthly</p> <p>(2) Monthly <input type="text"/></p> <p>(3) Weekly</p> <p>(4) Daily or almost daily</p>                        | <p>10. Has a relative or friend or a doctor or another health worker been concerned about your drinking or suggested you cut down?</p> <p>(0) No</p> <p>(2) Yes, but not in the last year</p> <p>(4) Yes, during the last year <input type="text"/></p>                          |
| <p>Sum up specific items values to calculate total, then record here <input type="text"/></p>                                                                                                                                                                                           |                                                                                                                                                                                                                                                                                  |
| <p>NB: If total is greater than recommended cut-off, consult User's Manual</p>                                                                                                                                                                                                          |                                                                                                                                                                                                                                                                                  |

**(B). Tobacco assessment questionnaire**

|                                                                                                                                                                 |                    |                          |
|-----------------------------------------------------------------------------------------------------------------------------------------------------------------|--------------------|--------------------------|
| Participant ID:                                                                                                                                                 |                    |                          |
| Please ask the participant, the following question and tick for each question in the provided box                                                               |                    |                          |
| 1. Do you currently use one or more of the following tobacco products (cigarettes, snuff, chewing tobacco, cigars, hookah (shisha), etc.)?                      | 1 = Ye:            | <input type="checkbox"/> |
|                                                                                                                                                                 | 2 = No:            | <input type="checkbox"/> |
| 2. In the past month, how often have you used one or more of the following tobacco products (cigarettes, snuff, chewing tobacco, cigars, hookah(shisha) ,etc.)? | 1=Once ortwice     | <input type="checkbox"/> |
|                                                                                                                                                                 | 2=Weekly           | <input type="checkbox"/> |
|                                                                                                                                                                 | 3= Almostdaily     | <input type="checkbox"/> |
|                                                                                                                                                                 | 4 = Daily          | <input type="checkbox"/> |
| 3. How soon after waking up do you smoke your first cigarette?                                                                                                  | 0 = 60+ minutes    | <input type="checkbox"/> |
|                                                                                                                                                                 | 1 = 31-60 minutes  | <input type="checkbox"/> |
|                                                                                                                                                                 | 2 = 5-30 minutes   | <input type="checkbox"/> |
|                                                                                                                                                                 | 3=Within 5 minutes | <input type="checkbox"/> |
| 4.Do you currently live with someone who smokes?                                                                                                                | 1 = Ye:            | <input type="checkbox"/> |
|                                                                                                                                                                 | 2 = No:            | <input type="checkbox"/> |
| 5. How many cigarettes a day do you smoke?                                                                                                                      | 0 = 10 or less     | <input type="checkbox"/> |
|                                                                                                                                                                 | 1 = 11 – 20        | <input type="checkbox"/> |
|                                                                                                                                                                 | 2 = 21 – 30        | <input type="checkbox"/> |
|                                                                                                                                                                 | 3= 31 ormore       | <input type="checkbox"/> |

**(C). Family support and traditional healers**

|                                                                 |             |                          |
|-----------------------------------------------------------------|-------------|--------------------------|
| 3. How the family member is supportive for your treatment?      | 1 = Never   | <input type="checkbox"/> |
|                                                                 | 2 = Somehow | <input type="checkbox"/> |
|                                                                 | 3 = Always  | <input type="checkbox"/> |
| 4. Are you using any traditional medicines to treat TB disease? | 1 = Yes     | <input type="checkbox"/> |
|                                                                 | 2 = No      | <input type="checkbox"/> |

**Part IV: Medicine -Related Factors**

|                                                                         |                               |                          |
|-------------------------------------------------------------------------|-------------------------------|--------------------------|
| 1(a). Do you experience any side effect when taking TB medications?     | 1 = Yes                       | <input type="checkbox"/> |
|                                                                         | 2 = No                        | <input type="checkbox"/> |
| 1(b). If the answer in 2(a) above is yes, which side effects?           | 1 = Diarrhea and vomiting     | <input type="checkbox"/> |
|                                                                         | 2 = Skin rashes               | <input type="checkbox"/> |
|                                                                         | 3 = Headache and Dizziness    | <input type="checkbox"/> |
|                                                                         | 4 = Numbness                  | <input type="checkbox"/> |
|                                                                         | 5 = Yellow coloration of eyes | <input type="checkbox"/> |
|                                                                         | 6 = Others                    | <input type="checkbox"/> |
|                                                                         |                               |                          |
| 2. Are you always tolerating taking the TB tablets without any problem? | 1 = Yes                       | <input type="checkbox"/> |
|                                                                         | 2 = No                        | <input type="checkbox"/> |
|                                                                         |                               | <input type="checkbox"/> |
|                                                                         |                               | <input type="checkbox"/> |

|                                                                      |                            |                          |
|----------------------------------------------------------------------|----------------------------|--------------------------|
| 3(a) Are you taking other medications apart from TB medications?     | 1 = Yes                    | <input type="checkbox"/> |
|                                                                      | 2 = No                     | <input type="checkbox"/> |
| (b). If yes to the above question, which medications are you taking? | 1 = Antiretroviral therapy | <input type="checkbox"/> |
|                                                                      | 2 = Methadone              | <input type="checkbox"/> |
|                                                                      | 3 = Anti-hypertension      | <input type="checkbox"/> |
|                                                                      | 4 = Diabetes medications   | <input type="checkbox"/> |
|                                                                      | 5 = Others                 | <input type="checkbox"/> |

**Part V: Condition-Related factors**

| LIST OF COMORBIDITIES                                                                   |                                       |                                                      |
|-----------------------------------------------------------------------------------------|---------------------------------------|------------------------------------------------------|
| Please ask the participant following question and tick the response in the box provided |                                       |                                                      |
| 1.HIV                                                                                   | 1 = Reactive<br>2 = Non-reactive      | <input type="checkbox"/><br><input type="checkbox"/> |
| 2.Diabetes Mellitus                                                                     | 1=Diabetic<br>2=Non-diabetic          | <input type="checkbox"/><br><input type="checkbox"/> |
| 3.Hypertension                                                                          | 1=Hypertensive<br>2=Not-Hypertensive  | <input type="checkbox"/><br><input type="checkbox"/> |
| 4.Drug Abuse                                                                            | 1= Drug abuser<br>2= Non-drug abuser  | <input type="checkbox"/><br><input type="checkbox"/> |
| 5.Other                                                                                 | 1=Yes<br>2=No<br>If Yes(mention)_____ | <input type="checkbox"/><br><input type="checkbox"/> |

## Part VI: Self-report questionnaire

### Adherence to TB medications measurement

|                                     |                               |
|-------------------------------------|-------------------------------|
| <b>Participant ID</b> _____         |                               |
| <b>Date of treatment initiation</b> | I _ I _ I _ I _ I _ I _ I _ I |

**Begin the questionnaire by saying** *“Most people with TB have many pills to take at different times during the day. Many people find it hard to always remember to take their pills. It is important for me to understand how you are really doing with your medicine. Don’t worry about telling me if you don’t always take all your doses. I need to know what is really happening, not what you think I want to hear.”*

|                                                                                   |                          |                          |
|-----------------------------------------------------------------------------------|--------------------------|--------------------------|
|                                                                                   | Yes                      | No                       |
| 1. Do you sometimes find it difficult to remember to take your medication?        | <input type="checkbox"/> | <input type="checkbox"/> |
|                                                                                   |                          |                          |
|                                                                                   | Yes                      | No                       |
| 2. When you feel better, do you sometimes take a break from your medication?      | <input type="checkbox"/> | <input type="checkbox"/> |
|                                                                                   |                          |                          |
|                                                                                   | Yes                      | No                       |
| 3. Thinking back over the past four days, have you missed any of your doses?      | <input type="checkbox"/> | <input type="checkbox"/> |
|                                                                                   |                          |                          |
|                                                                                   | Yes                      | No                       |
| 4. Sometimes if you feel worse when you take the medicine, do you stop taking it? | <input type="checkbox"/> | <input type="checkbox"/> |
|                                                                                   |                          |                          |

If all 4 answers are **No**, then the patient is classified as being adherent.

|                         |       |           |       |
|-------------------------|-------|-----------|-------|
| _____                   | _____ | _____     | _____ |
| Name of the interviewer | Title | Signature | Date  |
